# Supplementary material for: Complete genome sequencing and comparative genomic analysis of Lactobacillus acidophilus C5 as a potential canine probiotics
Source: PubMed Central journal article supplement — J Anim Sci Technol. 2021 Nov 30;63(6):1411–22. doi: 10.5187/jast.2021.e126 (PMC8672248; doi:10.5187/jast.2021.e126), 2021-11-30
Supplement: jast-63-6-1411-suppl1.pdf [file jast-63-6-1411-suppl1.pdf]

## Supplementary Data

**Supplementary Table 1. Genome information of the six *Lactobacillus acidophilus* strains from NCBI database**

| Strain    | Assembly    | Taxon ID | Length    | Genes | Reference                                                                               |
|-----------|-------------|----------|-----------|-------|-----------------------------------------------------------------------------------------|
| NCFM      | ASM1198v1   | 272621   | 1,993,560 | 1,963 | Pfeiler et al. [21]                                                                     |
| La14      | ASM38967v2  | 1314884  | 1,991,579 | 1,978 | Complete Genome Sequence of Probiotic Strain Lactobacillus acidophilus La-14            |
| FSI4      | ASM93462v1  | 1579     | 1,991,969 | 1,977 | Complete Genome Sequence of Lactobacillus acidophilus FSI4, Isolated from Yogurt        |
| ATCC53544 | ASM222430v1 | 1579     | 1,991,906 | 1,977 | Genome of Lactobacillus acidophilus strain ATCC 53544                                   |
| LA1       | ASM228621v1 | 1579     | 1,991,195 | 2,002 | Complete genome sequence of Lactobacillus acidophilus LA1                               |
| DSM20079  | ASM304706v1 | 1579     | 2,009,973 | 2,020 | The whole genome sequencing and assembly of Lactobacillus acidophilus DSM 20079T strain |

NCBI, National Center for Biotechnology Information Center.

**Supplementary Table 2. Significant evolutionarily accelerated genes identified in dN/dS analysis (the branch-site model) and related information for *Lactobacillus acidophilus* C5**

| Gene_ID    | Start     | End       | Length | Strand | COG | Gene product                                            | diff_InL.2 | Chisqu test | FDR      | #AA Change (#Sig) |
|------------|-----------|-----------|--------|--------|-----|---------------------------------------------------------|------------|-------------|----------|-------------------|
| C5_1_00009 | 15,595    | 16,678    | 1,084  | -      | S   | Putative membrane protein YdgH                          | 17.03      | 3.68E-05    | 3.79E-03 | 4 (0)             |
| C5_1_00026 | 32,426    | 33,881    | 1,456  | -      | S   | hypothetical protein                                    | 26.01      | 3.39E-07    | 1.04E-04 | 4 (1)             |
| C5_1_00138 | 148,018   | 148,726   | 709    | -      | S   | hypothetical protein                                    | 25.81      | 3.77E-07    | 1.04E-04 | 13 (7)            |
| C5_1_00140 | 150,441   | 150,660   | 220    | -      | R   | hypothetical protein                                    | 20.45      | 6.11E-06    | 7.20E-04 | 20 (10)           |
| C5_1_00253 | 242,731   | 243,085   | 355    | -      | G   | Oligo-1,6-glucosidase                                   | 11.04      | 8.91E-04    | 4.90E-02 | 6 (2)             |
| C5_1_00257 | 244,712   | 245,525   | 814    | -      | K   | Catabolite control protein Ad                           | 22.97      | 1.65E-06    | 2.49E-04 | 8 (1)             |
| C5_1_00352 | 336,963   | 337,302   | 340    | +      | S   | hypothetical protein                                    | 14.27      | 1.59E-04    | 1.14E-02 | 8 (4)             |
| C5_1_00359 | 341,349   | 341,709   | 361    | -      | P   | H(+)/Cl(-) exchange transporter ClcA                    | 12.48      | 4.11E-04    | 2.51E-02 | 5 (1)             |
| C5_1_00647 | 613,927   | 616,276   | 2,350  | +      | L   | Transcription-repair-coupling factor                    | 12.04      | 5.20E-04    | 3.06E-02 | 1 (1)             |
| C5_1_00767 | 705,460   | 705,760   | 301    | +      | O   | tRNA N6-adenosine threonylcarbamoyltransferase          | 30.80      | 2.85E-08    | 3.65E-05 | 15 (11)           |
| C5_1_00898 | 817,770   | 818,112   | 343    | +      | G   | Fructose-bisphosphate aldolase                          | 20.67      | 5.47E-06    | 7.18E-04 | 57 (6)            |
| C5_1_00919 | 832,019   | 832,469   | 451    | +      | U   | hypothetical protein                                    | 13.04      | 3.04E-04    | 2.01E-02 | 2 (2)             |
| C5_1_01000 | 914,379   | 914,928   | 550    | +      | J   | tRNA dimethylallyltransferase                           | 12.78      | 3.51E-04    | 2.23E-02 | 4 (2)             |
| C5_1_01133 | 1,057,899 | 1,058,238 | 340    | +      | G   | Glucose uptake protein GlcU                             | 24.85      | 6.20E-07    | 1.40E-04 | 11 (6)            |
| C5_1_01292 | 1,210,451 | 1,211,291 | 841    | +      | R   | hypothetical protein                                    | 28.23      | 1.08E-07    | 5.94E-05 | 16 (9)            |
| C5_1_01372 | 1,295,364 | 1,295,751 | 388    | -      | G   | hypothetical protein                                    | 18.19      | 2.00E-05    | 2.20E-03 | 8 (6)             |
| C5_1_01457 | 1,376,297 | 1,376,813 | 517    | -      | E   | L-cystine import ATP-binding protein TcyC               | 24.68      | 6.78E-07    | 1.40E-04 | 13 (8)            |
| C5_1_01510 | 1,441,239 | 1,449,198 | 7,960  | -      | R   | Levansucrase                                            | 15.96      | 6.47E-05    | 5.93E-03 | 12 (2)            |
| C5_1_01536 | 1,481,347 | 1,481,662 | 316    | -      | D   | Putative fluoride ion transporter CrcB                  | 22.95      | 1.66E-06    | 2.49E-04 | 30 (22)           |
| C5_1_01553 | 1,496,724 | 1,497,633 | 910    | -      | P   | Sodium, potassium, lithium and rubidium/H(+) antiporter | 15.17      | 9.81E-05    | 8.09E-03 | 4 (0)             |
| C5_1_01571 | 1,510,462 | 1,510,822 | 361    | -      | S   | hypothetical protein                                    | 11.72      | 6.19E-04    | 3.52E-02 | 4 (3)             |
| C5_1_01724 | 1,659,667 | 1,661,095 | 1,429  | -      | M   | Penicillin-binding protein 2B                           | 14.31      | 1.55E-04    | 1.14E-02 | 6 (2)             |
| C5_1_01764 | 1,697,228 | 1,698,386 | 1,159  | -      | L   | Putative defective protein IntQ                         | 13.87      | 1.96E-04    | 1.35E-02 | 2 (2)             |
| C5_1_01782 | 1,713,305 | 1,713,773 | 469    | -      | T   | Signal transduction histidine-protein kinase BaeS       | 20.60      | 5.66E-06    | 7.18E-04 | 5 (5)             |
| C5_1_01796 | 1,723,378 | 1,723,753 | 376    | -      | U   | hypothetical protein                                    | 15.58      | 7.91E-05    | 6.87E-03 | 3 (3)             |
| C5_1_01799 | 1,724,814 | 1,725,501 | 688    | -      | K   | putative transcriptional regulatory protein             | 27.25      | 1.79E-07    | 7.38E-05 | 6 (3)             |
| C5_1_01889 | 1,820,193 | 1,821,627 | 1,435  | -      | G   | Phosphoenolpyruvate-protein phosphotransferase          | 16.33      | 5.34E-05    | 5.18E-03 | 4 (0)             |
| C5_1_01983 | 1,909,806 | 1,910,190 | 385    | +      | L   | hypothetical protein                                    | 29.95      | 4.43E-08    | 3.65E-05 | 8 (6)             |
| C5_1_02023 | 1,944,357 | 1,944,594 | 238    | -      | K   | HTH-type transcriptional repressor YvoA                 | 24.30      | 8.24E-07    | 1.51E-04 | 13 (11)           |
| C5_1_02081 | 2,003,239 | 2,003,548 | 310    | +      | K   | hypothetical protein                                    | 14.77      | 1.22E-04    | 9.56E-03 | 6 (5)             |

dN/dS, the ratio of nonsynonymous to synonymous substitution COG, Clusters of Orthologous Groups; FDR, false discovery rate; ATP, adenosine triphosphate; S, function unknown; R, general function prediction only; G, carbohydrate transport and metabolism; K, transcription; P, inorganic ion transport and metabolism; L, replication, recombination and repair; O, posttranslational modification; U, intracellular trafficking, secretion, and vesicular transport; J, translation, ribosomal structure and biogenesis; E, amino acid transport and metabolism; D, cell cycle control, cell division, chromosome partitioning; M, cell wall/membrane/envelope biogenesis; T, -Signal transduction mechanisms.
